# Supplementary material
Source: Springer Nature journal article supplement (https://www.springermedizin.de/resource/supplementary/12889_2007_1217_MOESM2_ESM.pdf/9502714)
Supplement: MOESM2 [file 9502714]

**Additional file 2:**  
**Regional differences in knowledge on *Echinococcus multilocularis***

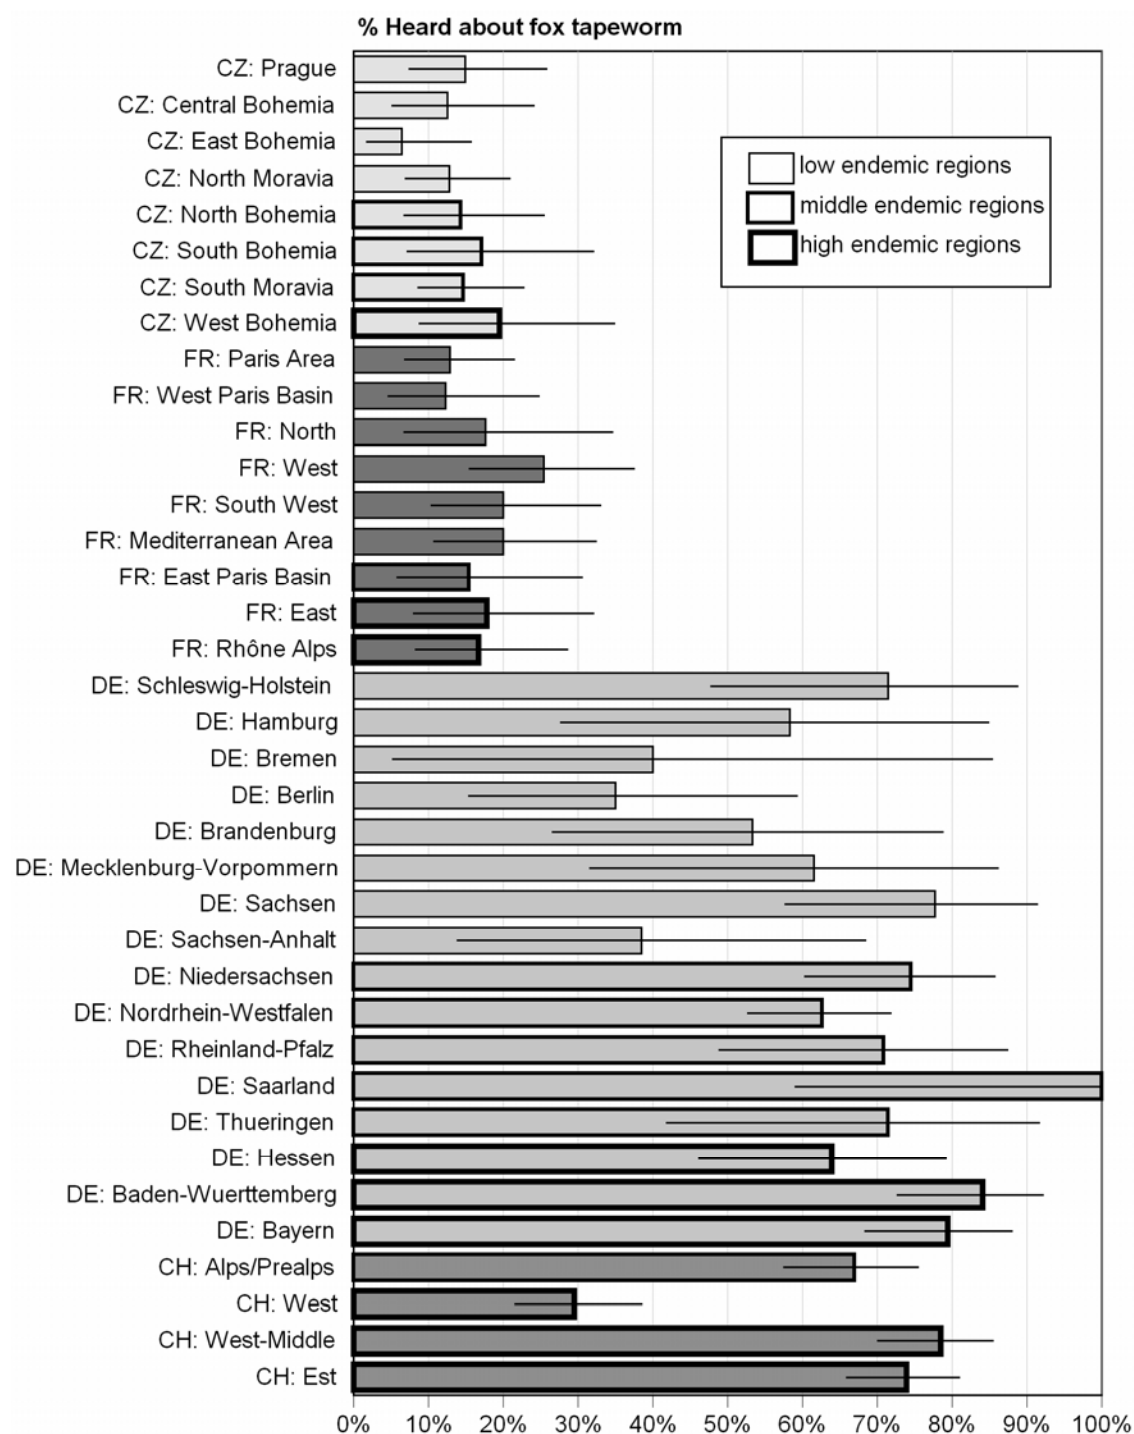

Percentage of interviewees that have ever heard about the fox tapeworm in low, middle and high endemic regions of the Czech Republic (CZ), France (FR), Germany (DE) and Switzerland (CH). Error lines represent 95% CI.
